# Supplementary material
Source: publisher site journal article supplement (http://e-cmh.org/upload/media/cmh-2023-0328-Supplementary-Table-2.pdf)
Supplement: Supplementary file 1 [file cmh-2023-0328-Supplementary-Table-2.pdf]

**Supplementary Table 2.** Baseline characteristics of 4,309 untreated patients with chronic hepatitis B

| Characteristics                      | Total (n=4,309)     |
|--------------------------------------|---------------------|
| <b>Demographic characteristics</b>   |                     |
| Age (yr)                             | 51.0 (41.4–58.5)    |
| Male, n (%)                          | 2,040 (47.3)        |
| Height (cm)                          | 165.8 (159.4–172.2) |
| Weight (kg)                          | 65.0 (56.0–73.0)    |
| Body mass index (kg/m <sup>2</sup> ) | 23.5 (21.5–25.7)    |
| <b>Comorbidities</b>                 |                     |
| Diabetes, n (%)                      | 134 (3.1)           |
| Hypertension, n (%)                  | 891 (20.7)          |
| Cirrhosis, n (%)                     | 371 (8.6)           |
| <b>Laboratory findings</b>           |                     |
| Platelets (×10 <sup>3</sup> /μL)     | 203.0 (167.0–239.0) |
| AST (IU/L)                           | 25.0 (21.0–31.0)    |
| ALT (IU/L)                           | 21.0 (15.0–30.0)    |
| Prothrombin time, INR                | 1.0 (1.0–1.0)       |
| Albumin (g/dL)                       | 4.2 (4.0–4.5)       |
| Total bilirubin (mg/dL)              | 0.7 (0.5–0.9)       |
| Creatinine (mg/dL)                   | 0.8 (0.7–0.9)       |
| eGFR (mL/min/1.73m <sup>2</sup> )    | 100.0 (91.0–108.0)  |
| Total cholesterol (mg/dL)            | 179.0 (156.0–200.0) |
| HDL (mg/dL)                          | 48.0 (43.0–58.5)    |
| LDL (mg/dL)                          | 105.0 (86.0–133.0)  |
| Triglyceride (mg/dL)                 | 90.0 (69.5–134.0)   |
| HBeAg-positive, n (%)                | 397 (12.9)          |
| HBV DNA (log <sub>10</sub> IU/mL)    | 2.5 (1.6–3.4)       |

Data are presented as a frequency and proportion or as a mean value with interquartile range.

ALT, alanine aminotransferase; AST, aspartate aminotransferase; INR, international normalized ratio; eGFR, estimated glomerular filtration rate; HDL, high-density lipoprotein; LDL, low-density lipoprotein; HBeAg, hepatitis B e antigen; HBV, hepatitis B virus.
